# Supplementary material for: Discovery of Five New Ethylene-Forming Enzymes for Clean Production of Ethylene in E. coli
Source: MDPI journal article supplement (doi:10.3390/ijms23094500), 2022-04-19
Supplement: s1 [file s1]

**Table S1.** Sequences for phylogenetic analysis.

| Names                           | Accession          | Description                                                      | Organisms                                                  | Length<br>[aa] | Taxonomy                                                                                                                                           |
|---------------------------------|--------------------|------------------------------------------------------------------|------------------------------------------------------------|----------------|----------------------------------------------------------------------------------------------------------------------------------------------------|
| AF101058<br>-<br>AAD1644<br>0.1 | AAD16440.1         | ethylene-forming<br>enzyme                                       | <i>Pseudomonas<br/>syringae</i> pv.<br><i>Phaseolicola</i> | 350            | Bacteria; Proteobacteria;<br>Gammaproteobacteria;<br>Pseudomonadales;<br>Pseudomonadaceae; <i>Pseudomonas</i>                                      |
| MBW4490<br>662                  | MBW449066<br>2.1   | MAG: hypothetical<br>protein KME12_23050                         | <i>Trichocoleus<br/>desertorum</i><br>ATA4-8-CV12          | 339            | Bacteria; Cyanobacteria;<br>Synechococcales;<br>Trichocoleusaceae; <i>Trichocoleus</i>                                                             |
| MBW4538<br>205                  | MBW453820<br>5.1   | MAG: hypothetical<br>protein KME43_03555                         | <i>Myxacorys<br/>chilensis</i><br>ATA2-1-KO14              | 352            | Bacteria; Cyanobacteria;<br>Pseudanabaenales;<br>Leptolyngbyaceae; <i>Myxacorys</i> ;<br><i>Myxacorys chilensis</i>                                |
| RAM5295<br>8                    | RAM52958.1         | MAG: MFS<br>transporter                                          | <i>Hapalosiphona<br/>ceae<br/>cyanobacteriu<br/>m</i> JJU2 | 360            | Bacteria; Cyanobacteria;<br>Nostocales; Hapalosiphonaceae                                                                                          |
| RCJ18531                        | RCJ18531.1         | MFS transporter                                                  | Nostoc sp.<br>ATCC 43529                                   | 361            | Bacteria; Cyanobacteria;<br>Nostocales; Nostocaceae; <i>Nostoc</i>                                                                                 |
| RML4951<br>4                    | RML49514.1         | 2OG-Fe oxygenase                                                 | <i>Pseudomonas<br/>syringae</i> pv.<br><i>pisi</i>         | 344            | Bacteria; Proteobacteria;<br>Gammaproteobacteria;<br>Pseudomonadales;<br>Pseudomonadaceae;<br><i>Pseudomonas</i> ; <i>Pseudomonas<br/>syringae</i> |
| TMH3290<br>0                    | TMH32900.1         | MAG: isopenicillin N<br>synthase family<br>oxygenase             | <i>Betaproteobact<br/>eria bacterium</i>                   | 352            | Bacteria; Proteobacteria;<br>Betaproteobacteria                                                                                                    |
| WP_01461<br>8742                | WP_0146187<br>42.1 | isopenicillin N<br>synthase family<br>oxygenase                  | <i>Ralstonia<br/>solanacearum</i>                          | 347            | Bacteria; Proteobacteria;<br>Betaproteobacteria;<br>Burkholderiales;<br>Burkholderiaceae; <i>Ralstonia</i>                                         |
| WP_01535<br>1455                | WP_0153514<br>55.1 | isopenicillin N<br>synthase family<br>oxygenase                  | <i>Myxococcus<br/>stipitatus</i>                           | 360            | Bacteria; Proteobacteria;<br>Deltaproteobacteria;<br>Myxococcales; Cystobacterineae;<br>Myxococcaceae; <i>Myxococcus</i>                           |
| WP_01936<br>2686                | WP_0193626<br>86.1 | isopenicillin N<br>synthase family<br>oxygenase                  | <i>Pseudomonas<br/>fuscovaginae</i>                        | 350            | Bacteria; Proteobacteria;<br>Gammaproteobacteria;<br>Pseudomonadales;<br>Pseudomonadaceae; <i>Pseudomonas</i>                                      |
| WP_05742<br>6137                | WP_0574261<br>37.1 | isopenicillin N<br>synthase family<br>oxygenase                  | <i>Pseudomonas<br/>syringae</i>                            | 345            | Bacteria; Proteobacteria;<br>Gammaproteobacteria;<br>Pseudomonadales;<br>Pseudomonadaceae; <i>Pseudomonas</i>                                      |
| WP_06334<br>3083                | WP_0633430<br>83.1 | MULTISPECIES:<br>isopenicillin N<br>synthase family<br>oxygenase | <i>Pseudomonas</i>                                         | 353            | Bacteria; Proteobacteria;<br>Gammaproteobacteria;<br>Pseudomonadales;<br>Pseudomonadaceae                                                          |

|                  |                    |                                                 |                                                 |     |                                                                                                                                                              |
|------------------|--------------------|-------------------------------------------------|-------------------------------------------------|-----|--------------------------------------------------------------------------------------------------------------------------------------------------------------|
| WP_07178<br>0333 | WP_0717803<br>33.1 | isopenicillin N<br>synthase family<br>oxygenase | <i>Fischerella</i> sp.<br>PCC 9431              | 385 | Bacteria; Cyanobacteria;<br>Nostocales; Hapalosiphonaceae;<br><i>Fischerella</i>                                                                             |
| WP_07495<br>0276 | WP_0749502<br>76.1 | isopenicillin N<br>synthase family<br>oxygenase | <i>Myxococcus</i><br><i>fulvus</i>              | 360 | Bacteria; Proteobacteria;<br>Deltaproteobacteria;<br>Myxococcales; Cystobacterineae;<br>Myxococcaceae; <i>Myxococcus</i>                                     |
| WP_09656<br>2523 | WP_0965625<br>23.1 | isopenicillin N<br>synthase family<br>oxygenase | <i>Scytonema</i> sp.<br>NIES-4073               | 359 | Bacteria; Cyanobacteria;<br>Nostocales; Scytonemataceae;<br><i>Scytonema</i> ; unclassified <i>Scytonema</i>                                                 |
| WP_11666<br>5714 | WP_1166657<br>14.1 | isopenicillin N<br>synthase family<br>oxygenase | <i>Pseudomonas</i><br>sp. GL93                  | 346 | Bacteria; Proteobacteria;<br>Gammaproteobacteria;<br>Pseudomonadales;<br>Pseudomonadaceae; <i>Pseudomonas</i>                                                |
| WP_12349<br>6614 | WP_1234966<br>14.1 | isopenicillin N<br>synthase family<br>oxygenase | <i>Pseudomonas</i><br><i>frederiksbergensis</i> | 344 | Bacteria; Proteobacteria;<br>Gammaproteobacteria;<br>Pseudomonadales;<br>Pseudomonadaceae; <i>Pseudomonas</i>                                                |
| WP_13111<br>8892 | WP_1311188<br>92.1 | isopenicillin N<br>synthase family<br>oxygenase | <i>Mastigocladus</i><br><i>laminosus</i>        | 360 | Bacteria; Cyanobacteria;<br>Nostocales; Hapalosiphonaceae;<br><i>Mastigocladus</i>                                                                           |
| WP_14164<br>1058 | WP_1416410<br>58.1 | isopenicillin N<br>synthase family<br>oxygenase | <i>Myxococcus</i>                               | 362 | Bacteria; Proteobacteria;<br>Deltaproteobacteria;<br>Myxococcales; Cystobacterineae;<br>Myxococcaceae; <i>Myxococcus</i>                                     |
| WP_16386<br>1341 | WP_1638613<br>41.1 | isopenicillin N<br>synthase family<br>oxygenase | <i>Myxococcus</i><br><i>eversor</i>             | 360 | Bacteria; Proteobacteria;<br>Deltaproteobacteria;<br>Myxococcales; Cystobacterineae;<br>Myxococcaceae; <i>Myxococcus</i>                                     |
| WP_16398<br>9172 | WP_1639891<br>72.1 | isopenicillin N<br>synthase family<br>oxygenase | <i>Pyxidicoccus</i><br><i>caerfyrddinensis</i>  | 358 | Bacteria; Proteobacteria;<br>Deltaproteobacteria;<br>Myxococcales; Cystobacterineae;<br>Myxococcaceae; <i>Pyxidicoccus</i>                                   |
| WP_16934<br>3509 | WP_1693435<br>09.1 | isopenicillin N<br>synthase family<br>oxygenase | <i>Pyxidicoccus</i><br><i>fallax</i>            | 356 | Bacteria; Proteobacteria;<br>Deltaproteobacteria;<br>Myxococcales; Cystobacterineae;<br>Myxococcaceae; <i>Pyxidicoccus</i>                                   |
| WP_17447<br>5597 | WP_1744755<br>97.1 | isopenicillin N<br>synthase family<br>oxygenase | <i>Myxococcus</i><br>sp. CA033                  | 360 | Bacteria; Proteobacteria;<br>Deltaproteobacteria;<br>Myxococcales; Cystobacterineae;<br>Myxococcaceae; <i>Myxococcus</i> ;<br>unclassified <i>Myxococcus</i> |
| WP_17643<br>4236 | WP_1764342<br>36.1 | isopenicillin N<br>synthase family<br>oxygenase | <i>Myxococcus</i><br>sp. AM011                  | 360 | Bacteria; Proteobacteria;<br>Deltaproteobacteria;<br>Myxococcales; Cystobacterineae;<br>Myxococcaceae; <i>Myxococcus</i> ;<br>unclassified <i>Myxococcus</i> |
| WP_18108<br>0955 | WP_1810809<br>55.1 | isopenicillin N<br>synthase family<br>oxygenase | <i>Pseudomonas</i><br><i>lurida</i>             | 351 | Bacteria; Proteobacteria;<br>Gammaproteobacteria;<br>Pseudomonadales;<br>Pseudomonadaceae; <i>Pseudomonas</i>                                                |

|                  |                    |                                                 |                                             |     |                                                                                                                                                              |
|------------------|--------------------|-------------------------------------------------|---------------------------------------------|-----|--------------------------------------------------------------------------------------------------------------------------------------------------------------|
| WP_18128<br>6820 | WP_1812868<br>20.1 | isopenicillin N<br>synthase family<br>oxygenase | <i>Pseudomonas<br/>brassicacearum</i>       | 346 | Bacteria; Proteobacteria;<br>Gammaproteobacteria;<br>Pseudomonadales;<br>Pseudomonadaceae; <i>Pseudomonas</i>                                                |
| WP_19113<br>3867 | WP_1911338<br>67.1 | isopenicillin N<br>synthase family<br>oxygenase | <i>Phormidium<br/>tenue</i>                 | 352 | Bacteria; Cyanobacteria;<br>Oscillatoriothyracaceae;<br>Oscillatoriales; Oscillatoriaceae;<br><i>Phormidium</i>                                              |
| WP_19387<br>4723 | WP_1938747<br>23.1 | isopenicillin N<br>synthase family<br>oxygenase | <i>Oculatella</i> sp.<br>LEGE 06141         | 356 | Bacteria; Cyanobacteria;<br>Pseudanabaenales;<br>Oculatellaceae; <i>Oculatella</i> ;<br>unclassified <i>Oculatella</i>                                       |
| WP_20671<br>5722 | WP_2067157<br>22.1 | isopenicillin N<br>synthase family<br>oxygenase | <i>Myxococcus</i><br>sp. SCHIC003           | 360 | Bacteria; Proteobacteria;<br>Deltaproteobacteria;<br>Myxococcales; Cystobacterineae;<br>Myxococcaceae; <i>Myxococcus</i> ;<br>unclassified <i>Myxococcus</i> |
| WP_21667<br>0419 | WP_2166704<br>19.1 | hypothetical protein                            | <i>Microcoleus<br/>asticus</i>              | 369 | Bacteria; Cyanobacteria;<br>Oscillatoriothyracaceae;<br>Oscillatoriales; Microcoleaceae;<br><i>Microcoleus</i>                                               |
| WP_21785<br>5079 | WP_2178550<br>79.1 | MFS transporter                                 | <i>Pseudomonas<br/>asgharzadehian<br/>a</i> | 339 | Bacteria; Proteobacteria;<br>Gammaproteobacteria;<br>Pseudomonadales;<br>Pseudomonadaceae; <i>Pseudomonas</i>                                                |
| WP_22301<br>8911 | WP_2230189<br>11.1 | MFS transporter                                 | <i>Pseudomonas</i><br>sp. P867              | 346 | Bacteria; Proteobacteria;<br>Gammaproteobacteria;<br>Pseudomonadales;<br>Pseudomonadaceae; <i>Pseudomonas</i>                                                |
| WP_22374<br>5345 | WP_2237453<br>45.1 | MFS transporter                                 | <i>Myxococcus</i><br>sp. XM-1-1-1           | 360 | Bacteria; Proteobacteria;<br>Deltaproteobacteria;<br>Myxococcales; Cystobacterineae;<br>Myxococcaceae; <i>Myxococcus</i> ;<br>unclassified <i>Myxococcus</i> |
| WP_22378<br>1934 | WP_2237819<br>34.1 | MFS transporter                                 | <i>Myxococcus</i><br>sp. AS-1-15            | 352 | Bacteria; Proteobacteria;<br>Deltaproteobacteria;<br>Myxococcales; Cystobacterineae;<br>Myxococcaceae; <i>Myxococcus</i> ;<br>unclassified <i>Myxococcus</i> |
| WP_22949<br>6330 | WP_2294963<br>30.1 | hypothetical protein                            | <i>Nostoc<br/>mirabile</i>                  | 360 | Bacteria; Cyanobacteria;<br>Nostocales; Nostocaceae; <i>Nostoc</i>                                                                                           |

**Table S2. Parameters of the five constructed models based on 6VP4.1.A.**

| <b>Proteins</b> | <b>Oligo-State</b> | <b>Seq Identity</b> | <b>GMQE</b> | <b>QMEANDisCo Global</b> | <b>Ligands</b>     |
|-----------------|--------------------|---------------------|-------------|--------------------------|--------------------|
| Efe_MS          | Monomer            | 63.29%              | 0.87        | 0.86 ± 0.05              | 1xAKG, 1xFE        |
| Efe_RS          | Monomer            | 61.40%              | 0.87        | 0.84 ± 0.05              | 1xAKG, 1xFE        |
| Efe_MA          | Monomer            | 67.74%              | 0.85        | 0.87 ± 0.05              | 1xARG, 1xAKG, 1xFE |
| Efe_NS          | Monomer            | 67.25%              | 0.87        | 0.87 ± 0.05              | 1xAKG, 1xFE        |
| Efe_SS          | Monomer            | 68.10%              | 0.88        | 0.87 ± 0.05              | 1xARG, 1xAKG, 1xFE |

\* 1 x AKG:  $\alpha$ -ketoglutaric acid ligand binding sites; 1 x ARG: arginine ligand binding sites; 1 x FE: FE (III) ion ligand binding sites.

\*GMQE (Global Model Quality Estimate) and QMEANDisCo global (QMEAN: Qualitative Model Energy Analysis) give an overall model quality measurement between 0 and 1, with higher numbers indicating higher expected quality. GMQE is coverage dependent, i.e., a model covering only half of the target sequence is unlikely to get a score above 0.5 QMEANDisCo on the other hand evaluates the model 'as is' without explicit coverage dependency.

(a)

Efe\_MS

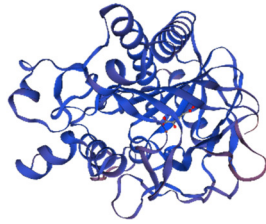

Efe\_RS

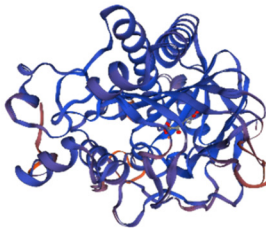

Efe\_MA

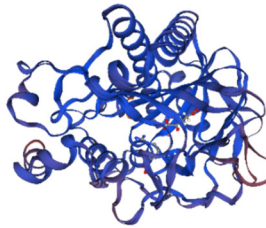

Efe\_NS

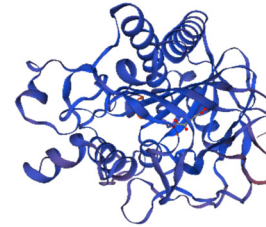

Efe\_SS

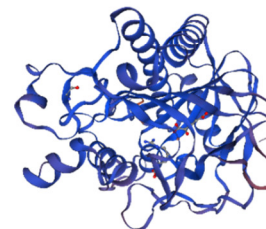

```
Model_02 MTDLQDLPKPSITGQSDIDLAHQNIQAWRTDGIQVYMNIAQRTKTESAFES 55
6vp4.1.AMTNLQDLPTEVTGADISLGRALIQAWRTDGIQVYMNIAQRTKTESAFES 55
Model_02 RHFPRQSLERKARCVSDLTYSYVYASGEEDPAGSDISYEVETQCRWPLTDQV 110
6vp4.1.AKQFQSLERKARCVSDLTYSYVYASGEEDPAGSDISYEVETQCRWPLTDQV 110
Model_02 SKWPCDQGFNFDSMRQSQCAHASELGSYGERLLRLIALQGLDIDALITDTH 165
6vp4.1.AQWPCDQGFNFDSMRQSQCAHASELGSYGERLLRLIALQGLDIDALITDTH 165
Model_02 GRHHMRVLEDFALSKSTRGIGADTDYGLVIAAADDVGGLYRFPVEGEKRRN 220
6vp4.1.AGWHMRVLEDFALSKSTRGIGADTDYGLVIAAADDVGGLYRFPVEGEKRRN 220
Model_02 NLPHSSAGMYEHDEDFWVKEVFGVLTVPDQILQFDINGYLLSTHRYVLTN 275
6vp4.1.AWLPQESSAGMYEHDEDFWVKEVFGVLTVPDQILQFDINGYLLSTHRYVLTN 275
Model_02 RRFALAYTFEPNFCAQFLFAPSDEDEHYGTHFTNMFMRYYPDRVTTRRI 330
6vp4.1.ARRFALAYTFEPNFCAQFLFAPSDEDEHYGTHFTNMFMRYYPDRVTTRRI 330
Model_02 SKITLTLNLRQEAFLRTAFLEAVFLQRAAG 360
6vp4.1.AENRLAHLEDLKKYSDDR----- 360
Model_03 MGLTQDPLFERILHSEAHRLQGDQNVAAWRADGICFVYMNIAQRTKTESAFES 55
6vp4.1.AMTNLQDLPTEVTGADISLGRALIQAWRTDGIQVYMNIAQRTKTESAFES 55
Model_03 RHFPRQSLERKARCVSDLTYSYVYASGEEDPAGSDISYEVETQCRWPLTDQV 110
6vp4.1.AKQFQSLERKARCVSDLTYSYVYASGEEDPAGSDISYEVETQCRWPLTDQV 110
Model_03 SKWPCDQGFNFDSMRQSQCAHASELGSYGERLLRLIALQGLDIDALITDTH 165
6vp4.1.AQWPCDQGFNFDSMRQSQCAHASELGSYGERLLRLIALQGLDIDALITDTH 165
Model_03 GRHHMRVLEDFALSKSTRGIGADTDYGLVIAAADDVGGLYRFPVEGEKRRN 220
6vp4.1.AGWHMRVLEDFALSKSTRGIGADTDYGLVIAAADDVGGLYRFPVEGEKRRN 220
Model_03 NLPHSSAGMYEHDEDFWVKEVFGVLTVPDQILQFDINGYLLSTHRYVLTN 275
6vp4.1.AWLPQESSAGMYEHDEDFWVKEVFGVLTVPDQILQFDINGYLLSTHRYVLTN 275
Model_03 RRFALAYTFEPNFCAQFLFAPSDEDEHYGTHFTNMFMRYYPDRVTTRRI 330
6vp4.1.ARRFALAYTFEPNFCAQFLFAPSDEDEHYGTHFTNMFMRYYPDRVTTRRI 330
Model_03 SKITLTLNLRQEAFLRTAFLEAVFLQRAAG 360
6vp4.1.AENRLAHLEDLKKYSDDR----- 360
Model_02 MTDLQDLPKPSITGQSDIDLAHQNIQAWRTDGIQVYMNIAQRTKTESAFES 55
6vp4.1.AMTNLQDLPTEVTGADISLGRALIQAWRTDGIQVYMNIAQRTKTESAFES 55
Model_02 RHFPRQSLERKARCVSDLTYSYVYASGEEDPAGSDISYEVETQCRWPLTDQV 110
6vp4.1.AKQFQSLERKARCVSDLTYSYVYASGEEDPAGSDISYEVETQCRWPLTDQV 110
Model_02 SKWPCDQGFNFDSMRQSQCAHASELGSYGERLLRLIALQGLDIDALITDTH 165
6vp4.1.AQWPCDQGFNFDSMRQSQCAHASELGSYGERLLRLIALQGLDIDALITDTH 165
Model_02 GRHHMRVLEDFALSKSTRGIGADTDYGLVIAAADDVGGLYRFPVEGEKRRN 220
6vp4.1.AGWHMRVLEDFALSKSTRGIGADTDYGLVIAAADDVGGLYRFPVEGEKRRN 220
Model_02 NLPHSSAGMYEHDEDFWVKEVFGVLTVPDQILQFDINGYLLSTHRYVLTN 275
6vp4.1.AWLPQESSAGMYEHDEDFWVKEVFGVLTVPDQILQFDINGYLLSTHRYVLTN 275
Model_02 RRFALAYTFEPNFCAQFLFAPSDEDEHYGTHFTNMFMRYYPDRVTTRRI 330
6vp4.1.ARRFALAYTFEPNFCAQFLFAPSDEDEHYGTHFTNMFMRYYPDRVTTRRI 330
Model_02 SKITLTLNLRQEAFLRTAFLEAVFLQRAAG 360
6vp4.1.AENRLAHLEDLKKYSDDR----- 360
Model_02 MTDLQDLPKPSITGQSDIDLAHQNIQAWRTDGIQVYMNIAQRTKTESAFES 55
6vp4.1.AMTNLQDLPTEVTGADISLGRALIQAWRTDGIQVYMNIAQRTKTESAFES 55
Model_02 RHFPRQSLERKARCVSDLTYSYVYASGEEDPAGSDISYEVETQCRWPLTDQV 110
6vp4.1.AKQFQSLERKARCVSDLTYSYVYASGEEDPAGSDISYEVETQCRWPLTDQV 110
Model_02 SKWPCDQGFNFDSMRQSQCAHASELGSYGERLLRLIALQGLDIDALITDTH 165
6vp4.1.AQWPCDQGFNFDSMRQSQCAHASELGSYGERLLRLIALQGLDIDALITDTH 165
Model_02 GRHHMRVLEDFALSKSTRGIGADTDYGLVIAAADDVGGLYRFPVEGEKRRN 220
6vp4.1.AGWHMRVLEDFALSKSTRGIGADTDYGLVIAAADDVGGLYRFPVEGEKRRN 220
Model_02 NLPHSSAGMYEHDEDFWVKEVFGVLTVPDQILQFDINGYLLSTHRYVLTN 275
6vp4.1.AWLPQESSAGMYEHDEDFWVKEVFGVLTVPDQILQFDINGYLLSTHRYVLTN 275
Model_02 RRFALAYTFEPNFCAQFLFAPSDEDEHYGTHFTNMFMRYYPDRVTTRRI 330
6vp4.1.ARRFALAYTFEPNFCAQFLFAPSDEDEHYGTHFTNMFMRYYPDRVTTRRI 330
Model_02 SKITLTLNLRQEAFLRTAFLEAVFLQRAAG 360
6vp4.1.AENRLAHLEDLKKYSDDR----- 360
```

(b)

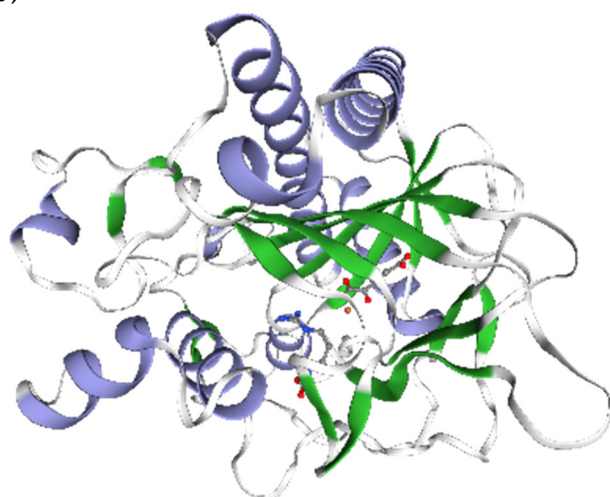

Efe\_PS-AAD16440.1 (6vp4.1.A)

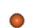

FE(III)ION

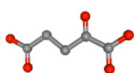

2-OXOGLUTARIC ACID

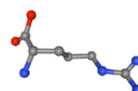

ARGININE

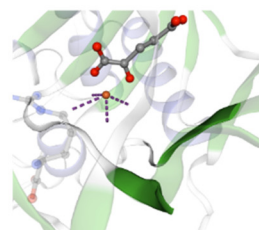

FE site

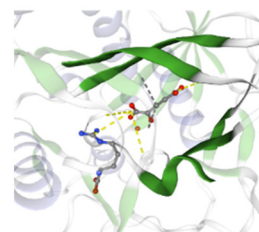

AKG site

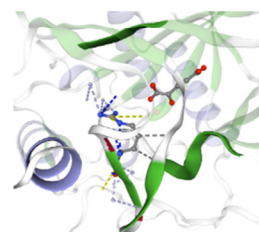

ARG site

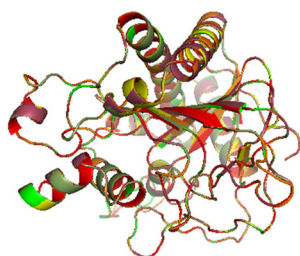

All the six

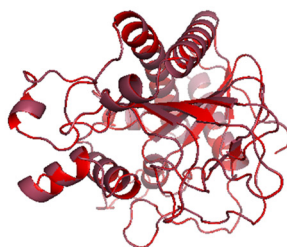

Efe\_MS RMSD=0.057 (322 to 322 atoms)

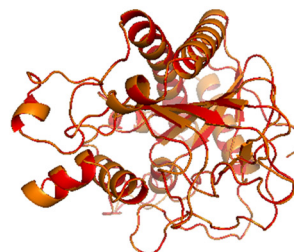

Efe\_RS RMSD=0.056 (297 to 297 atoms)

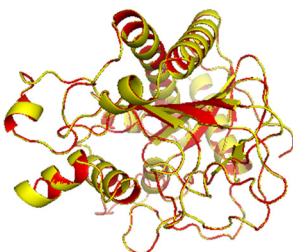

Efe\_MA RMSD=0.055 (312 to 312 atoms)

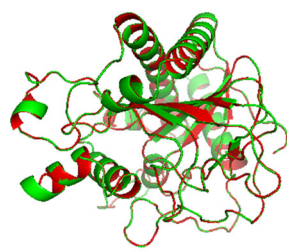

Efe\_NS RMSD=0.054 (314 to 314 atoms)

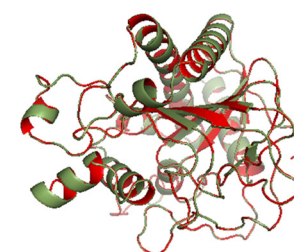

Efe\_SS RMSD=0.058 (318 to 318 atoms)

**Figure S1.** Model of Efes, 6VP4.1.A and its active sites. (a) Efe models constructed by SWISS MODEL and structure aligning to 6VP4.1.A. They are shown by confidence level: blue—red: high confidence—low confidence.  $\alpha$ -helix: labeled with the arrow;  $\beta$ -helix: labeled with square. Little change shows in  $\alpha$ -helix or  $\beta$ -helix and most sites are in high confidence. Changes are marked by red box. (b) Model of 6VP4.1.A and its active sites ( $\alpha$ -helix: purple;  $\beta$ -helix: green; active sites are darker in the right figures). (c) Structure alignment by PyMOL between five Efes and 6vp4.1.A (in red). RMSD root-mean-square deviation, a parameter used to indicate differences in atomic positions between protein structures. RMSDs of these five aligning are all less than 0.1 (abnormal atoms were rejected during the cycle), which means these models have little difference in structures. There are slight fluctuations in atomic positions between protein structures, while the main frameworks remain the same.

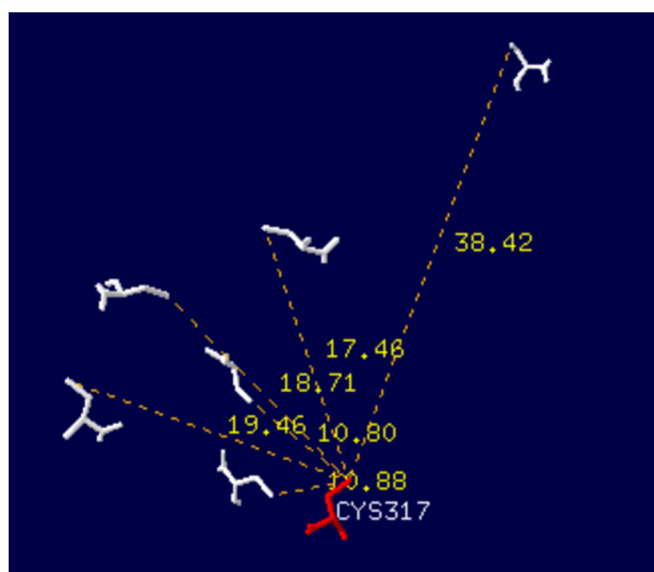

**Figure S2.** Analysis of disulfide bond formation of cysteine residue in the original model 6VP4.1.A.



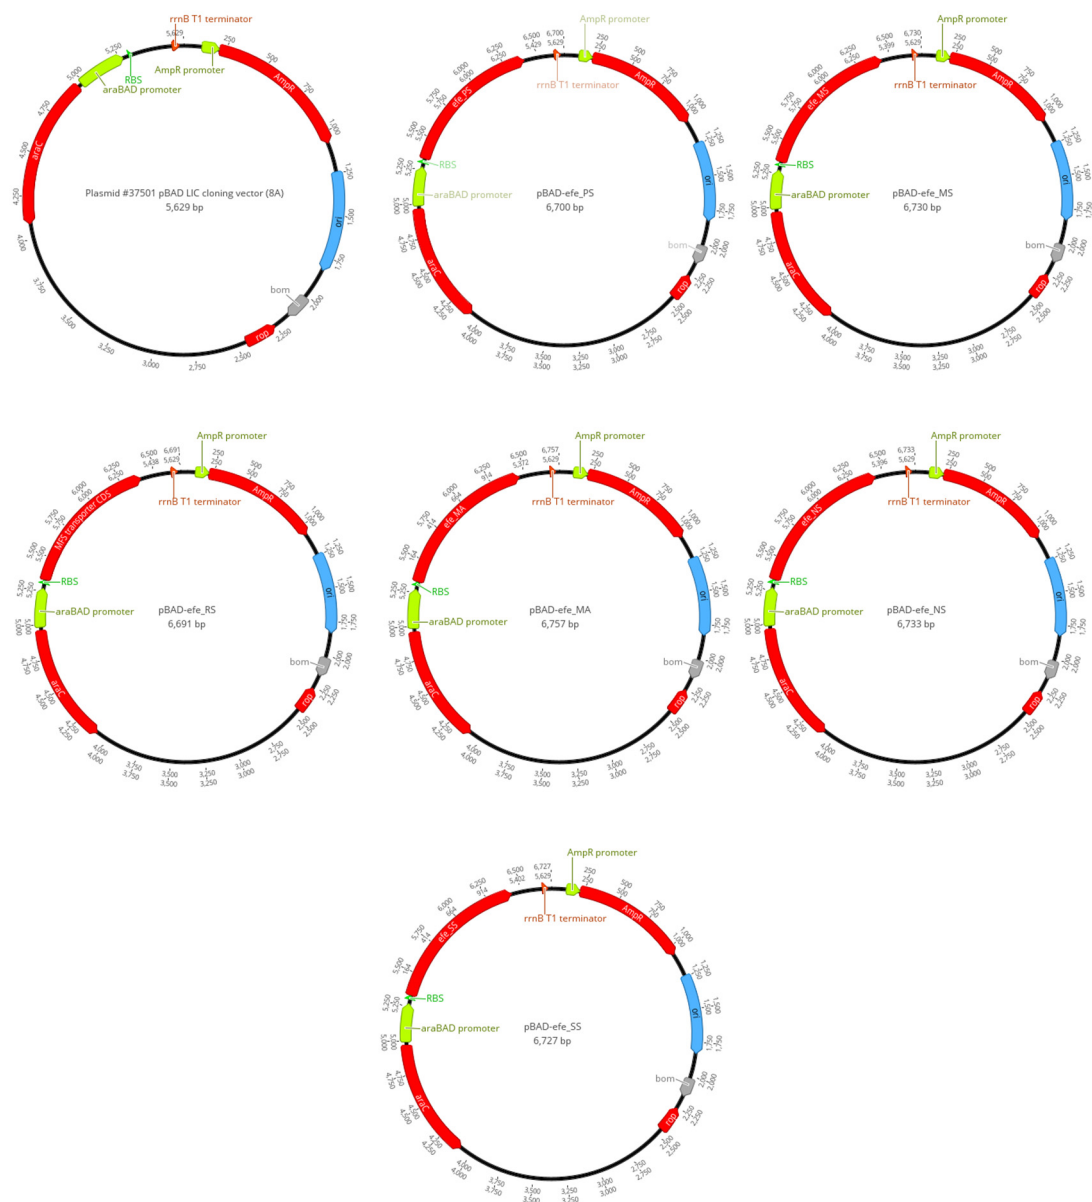

**Figure S3.** Plasmids profiles of pBAD\_LIC\_cloning vector and the six recombinant plasmids.



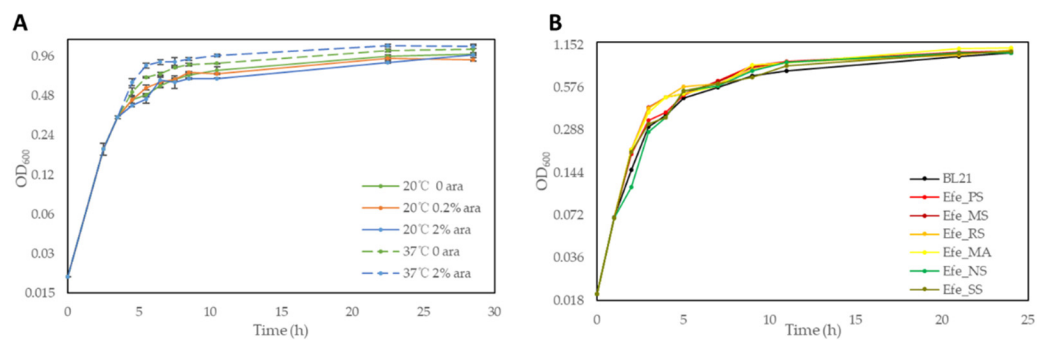

**Figure S4.** Growth curves of BL21\_efe<sup>+</sup> in LB medium with arabinose and antibiotic (ampicillin) in low temperature. **(A).** Growth in LB with arabinose concentration of 0 (green), 0.2% (orange) and 2% (blue) under 20 °C (full line) or 37 °C (dashed line); **(B).** Growth curve of the six engineering strains in LB with 2% arabinose and 50 µg/mL ampicillin: black: BL21\_WT; red: Efe\_PS; rose red: Efe\_MS; orange: Efe\_RS; yellow: Efe\_MA; green: Efe\_NS; brown: Efe\_SS.

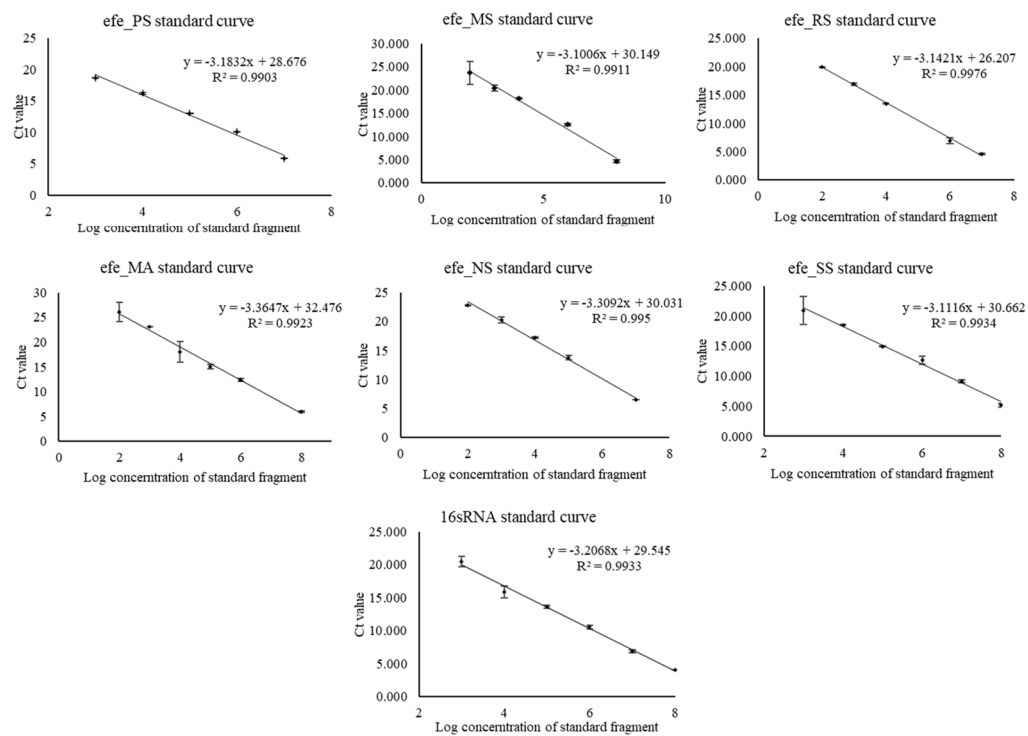

**Figure S5.** RT-qPCR standard curves of *efe* genes and 16sRNA gene.

**Table S3.** Protein MS (Q-E test) results of Efes.

| Accession | Mass  | Score | Matches <sup>1</sup> | Sequences <sup>2</sup> | emPAI <sup>3</sup> | Coverage |
|-----------|-------|-------|----------------------|------------------------|--------------------|----------|
| Efe_NS    | 39593 | 9040  | 268(233)             | 35(27)                 | 49.86              | 71%      |
| Efe_PS    | 39819 | 3179  | 160(113)             | 37(20)                 | 12.90              | 70%      |
| Efe_RS    | 41756 | 2542  | 89(70)               | 30(18)                 | 12.35              | 68%      |
| Efe_MS    | 40953 | 2060  | 129(74)              | 32(15)                 | 8.50               | 58%      |
| Efe_SS    | 39223 | 1406  | 70(33)               | 24(10)                 | 1.44               | 47%      |
| Efe_MA    | 42477 | 634   | 53(24)               | 21(10)                 | 1.85               | 30%      |

<sup>1</sup>Matches: the total number of peptide matches, in parentheses, is the number of matches above the significance threshold; <sup>2</sup>Sequences: the total number of matched sequences is the number of sequences higher than the significance threshold in parentheses; <sup>3</sup>emPAI:  $10^{(\text{Nobserved}/\text{Nobservable})-1}$

|                                                                                                                                                                                                                                                                                                                                                                                                                                                                                                                    |                                                                                                                                                                                                                                                                                                                                                                                                                                                                                                                             |
|--------------------------------------------------------------------------------------------------------------------------------------------------------------------------------------------------------------------------------------------------------------------------------------------------------------------------------------------------------------------------------------------------------------------------------------------------------------------------------------------------------------------|-----------------------------------------------------------------------------------------------------------------------------------------------------------------------------------------------------------------------------------------------------------------------------------------------------------------------------------------------------------------------------------------------------------------------------------------------------------------------------------------------------------------------------|
| <p><b>Efe_PS Score: 3179</b></p> <p>1 MTNLQTFELP TEVTGCAADI SLGRALIQAQ QKDGIPIKTI DSEQDRKTQE<br/> 51 AMAASKQFCK EPLTFKSSCV SDLTYSGYVA SGEEVTAGKP DFPEIFTVCK<br/> 101 DLSVGDRVK AGWPCGHPVP WPNNTYQKSM KTFMEELGLA GERLLKLTAL<br/> 151 GFELPINTFT DLTRDGWHHM RVLRFPPQTS TLSRGIGAHT DYGLLVIAAQ<br/> 201 DDVGGLYIRP PVEGEKRNRR WLPCESSAGM FEHDEPWTFF TPTPGWTVF<br/> 251 PGDILQFMIG QLLSTPHKV KLNTRERFAC AYFHEPNFEA SAYPLFEPSA<br/> 301 NERIHYGEHF TNMFMRCPYP RITTQRINKE NLAHLEDLK KYSDTRATGS<br/> 351 _</p>             | <p><b>Efe_MS Score: 2060</b></p> <p>1 MIELETFLQP QSVSGREADI ALGLTMVRAW RRDGIQVVM SPAQAEKSQR<br/> 51 AFELSRHFFR QSLETKARCV SDLTYSGYIA SQQELTASEA DLSEVFTVCR<br/> 101 DVPLTDPRVQ SKWPCHGCPG WPDESWRQGM QAHAELGSV GERLLRLIAL<br/> 151 GLGLDIDALT TLTHDGWHHM RVLRFPPARP TTRTGIGAHT DYGLLVIAAQ<br/> 201 DDVGGLYIRP PVEGEKRNRR WLPHESSAGM YEHEDEPWTFF KPVPGVLTFF<br/> 251 PGDILQFLTR GYLLSTPHKV VLNTRERFAL AYFHEPQFEA CVRPLSAPTR<br/> 301 DEYIHYGTHF TNMFMRSYPD RVTTQRILDE SRLTTLSWLR QEAVLRTAPL<br/> 351 EAVPLQRAAG _</p>        |
| <p><b>Efe_NS Score: 9040</b></p> <p>1 MTGLTTFHLP ERILHSEHR QLQDMVAAW RADGIFQIAL STPQQHTTDE<br/> 51 AFAQSRFFFE LDFETKRRHV SELTYSGYIA SREEITAGEA DYSEIFTICP<br/> 101 DIGMDDVRVR EGWPCGHPVP WPGTAYRDRM TDFTGMLGAF GERLLQLTAL<br/> 151 GLGLDDMETF TRLTRDGWHHM MRVLRFPVTP SSENARGIGA HTDYGLLVIAA<br/> 201 AQDDVGGLYV RPPIAGERRN RNWLPSESTA GMFEHDDGWT FIKPEPAVLT<br/> 251 VFPQDFLQFL TGGHLMSTPH KVLNTRERF AMAYFHEPNF DAWVEPLKAD<br/> 301 ADTDAPIHY GTHFTNFMFR CYPKRITTRR IEEQGLDLRL PALGEVA_<br/> 351 _</p>             | <p><b>Efe_MA Score: 634</b></p> <p>1 MTHKYQEKIE VSNLQIFHLP ESITGIQSDI DIARQMIQAW RRDGIHFHVA<br/> 51 NKIQERKSER TFAASRRFFG MPLESKSQFI SDLTYSGYIA SGEEVTAGES<br/> 101 DYSEIFTVCK DVPLNDRRVQ AQWPCGHPAP WPDEDYQSM KAYMDELGSI<br/> 151 GEKLLKLTAL GLELDDINAL TELTKDGWHH MRVLRFPALS QKSTRGIGAH<br/> 201 TDYGLLVIAA QDDVGGLYIR PPVEGEKRNRR NWLPTESMGG MYNEEPWIL<br/> 251 VKPVPSVLTV FPGDILQFLT NGYLLSTPHK VRLNTRERFA IAYFHEPNFE<br/> 301 ACVRPLFAPS SDEHIHYGSH FTNMFMRCPY DRITTRRIID ENRLSILGLV<br/> 351 KNEGLRRLTT AKKAIELQR</p> |
| <p><b>Efe_RS Score: 2542</b></p> <p>1 MTDLQTFDLP KSITGQSADI DLAHQMIQAW RTDGIFQVAT NAIQTRKTEN<br/> 51 AFEASRRFFR MPLDFKSQCI SNLTYSGYIA SGEEITAGES DYSEIFTICK<br/> 101 DVRLDDVRVQ AQWPCGHPVP WPDNNYHQN KAFMDLGLI GEKLLKLTAL<br/> 151 GLELDDINAL TKLTRDGWHH MRVLRFPALS EKSTRGIGAH TDYGLLVIAA<br/> 201 QDDVGGLYIR PPVEGEKRNRR NWLSDSSAG MYENDPWTFF VKPVPSVLTV<br/> 251 FPGDILQFMT HNYLLSTPHK VRLNTRERFA LAYFHEPNFD ACVRPLFDPS<br/> 301 NDDYIHYGTH FTNMFMRCPY YRITTRRIID EDRLSVLELL RNEALGMLR<br/> 351 PKYKTLVPSY L</p> | <p><b>Efe_SS Score: 1406</b></p> <p>1 MTDLQTFHLP KSITGQSADI DTAREIIQAW RTDGIFQVAT NTIQDRKTES<br/> 51 AFEASRRFFR MPKFKSQCI SDLNYYGYIA SGEEVTAGKS DYSEIYTICK<br/> 101 DIPLNDARVQ AQWPCGHPMP WPDQEHQSM KVFMDLGLI GEKLLKLTAL<br/> 151 GLGLDDINAL TKLTRDGWHH MRVLRFPPTS QKSARGIGAH TDYGLLVIAA<br/> 201 QDDVGGLYIR PPVEGEKRNRR NWLSTESMAG MYENDPWTFF VKPVPSVLTV<br/> 251 FPGDILQFLT NGYLLSTPHK VRLNTRERFA LAYFHEPNFD ACVRPLFDPS<br/> 301 SDEHIHYGTH FTNMFMRCPY DRITTRRIIN EDRLSILAR ENKTLGRLLT<br/> 351 MKNAYALQR</p>             |

**Figure S6.** Protein MS sequence alignment.
